# Supplementary material for: Mesoporous graphitic carbon nitride@NiCo2O4 nanocomposite as a solid phase microextraction coating for sensitive determination of environmental pollutants in human serum samples
Source: Royal Society of Chemistry journal article supplement (doi:10.1039/c9cc04348a), 2019-01-01
Supplement: c9cc04348a1.pdf [file c9cc04348a1.pdf]

## Supplementary Information

### **Mesoporous graphitic carbon nitride@NiCo<sub>2</sub>O<sub>4</sub> nanocomposite as solid phase microextraction coating for sensitive determination of environmental pollutants in human serum sample**

**Jing Zhang,<sup>a</sup> Wenqi Li,<sup>a</sup> Wenli Zhu,<sup>a</sup> Peige Qin,<sup>a</sup> Minghua Lu<sup>\*a</sup>, Xuebin Zhang,<sup>b</sup> Yuchen Miao,<sup>b</sup> and Zongwei Cai<sup>\*c</sup>**

<sup>a</sup> Henan International Joint Laboratory of Medicinal Plants Utilization, School of Chemistry and Chemical Engineering, Henan University, Kaifeng 475004, Henan, China. E-mail: mhlu@henu.edu.cn

<sup>b</sup> Center for Multi-Omics Research, State Key Laboratory of Cotton Biology, Institute of Plant Stress Biology, Henan University, Kaifeng 475004, Henan, China

<sup>c</sup> State Key Laboratory of Environmental and Biological Analysis, Department of Chemistry, Hong Kong Baptist University, Hong Kong SAR, China. E-mail: zwcai@hkbu.edu.hk

## 1. Experiments

### 1.1 Reagents and materials

Ni(NO<sub>3</sub>)<sub>2</sub>·6H<sub>2</sub>O, Co(NO<sub>3</sub>)<sub>2</sub>·6H<sub>2</sub>O, tetraethyl silicate (TEOS, C<sub>2</sub>H<sub>5</sub>O<sub>4</sub>Si), ammonium bifluoride (NH<sub>4</sub>HF<sub>2</sub>), hexamethylenetetramine (HMTA, C<sub>6</sub>H<sub>12</sub>N<sub>4</sub>), PCBs containing 4-Chlorobiphenyl (PCB-3), 3,4-Dichlorobiphenyl (PCB-12) and 3,5-Dichlorobiphenyl (PCB-14), PAHs including naphthalene (NAP), acenaphthene (ANE), fluorene (FLU), phenanthrene (PHE), anthracene (ANT) and pyrene (PYR) were acquired from Aladdin (Shanghai, China). P123 (Mw=5800, PEO<sub>20</sub>PPO<sub>70</sub>PEO<sub>20</sub>), poly (diallyldimethylammonium chloride) solution (PDDA) were purchased from Sigma-Aldrich (St. Louis, MO, USA). HPLC grade acetone (ACE) were obtained from Merck KGaA (Darmstadt, Germany). Dehydrated alcohol (EtOH), hydrochloric acid (HCl), nitric acid (HNO<sub>3</sub>) and urea were received from Kermel chemical reagent Co., Ltd. (Tianjin, China). Ultrapure water (18.2 MΩ cm<sup>-1</sup>) purified with a Milli-Q purification system (Millipore, Bedford, MA, USA) was used throughout the experiments. All the chemicals were of analytical grade.

Single stock standard solutions of three PCBs and six PAHs were prepared in ACE at a concentration of 0.1 mg·mL<sup>-1</sup>. The mixed stock standard solution was obtained by diluting each single stock solution with ACE stepwise. The working standard solutions were prepared by a suitable dilution of the mixed stock standard solution with ultrapure water. Above mentioned standard solution were stored at 4 °C in the darkness.

### 1.2 Instruments

All chromatographic analysis were performed on an Agilent 7890B gas chromatography equipped with a HP-5 capillary column (30 m×0.32 mm×0.25 μm) and a flame ionization detector (FID). High purity nitrogen (99.99%) was used as carrier gas at a constant flow rate of 1.0 mL·min<sup>-1</sup>. The injector temperature was set at 290 °C and fiber desorption was carried out for 2.5 min under the splitless mode. The detector temperature was 300 °C. The GC oven temperature program was set as

follows: initially maintained at 60 °C for 1 min, then increased to 190 °C (held for 1 min) with a rate of 65 °C·min<sup>-1</sup>, and again ramped at 6 °C·min<sup>-1</sup> to 220 °C held for 0.5 min, finally heated to 300 °C at a rate of 80 °C·min<sup>-1</sup> and held for 1 min, the total running time was 11.5 min.

The structure and morphology of the fiber coating was characterized by using a ZEISS GeminiSEM 500 (England) scanning electron microscopy (SEM) assembled with energy dispersive X-ray spectrometer (EDS). The X-ray powder diffraction (XRD) measurement was recorded on a Bruker D8 Advance X-ray diffractometer with Cu K $\alpha$  radiation. Infrared absorption spectrum was performed on an infrared Fourier transform spectrometer (Bruker, VERTEX 70). Thermogravimetric analysis experiments (TGA, QMS 403 D Aëolos®, NETZSCH, Germany) was performed to evaluate the thermal stability of the fiber coating from room temperature to 800 °C in flowing N<sub>2</sub> at heating rate of 10 °C·min<sup>-1</sup>.

### *1.3 Preparation SPME coating*

#### *1.3.1 Synthesis of MCN*

The synthesis of MCN was according to our previous described methods by using a green hexamethylenetetramine as precursor and SBA-15 as silica template.<sup>1</sup> Initially, 1.0 g of SBA-15 template was dispersed in the mixture solution of 10.0 mL ultrapure water and 8.0 g HMTA with straight stirring for 5 h at the room temperature. Subsequently, the mixture was evaporated at 50 °C to remove water. The obtained white solid was dried in an oven overnight, followed by heated to 550 °C in nitrogen atmosphere for 4 h with the ramping rate of 2 °C·min<sup>-1</sup>. Then, the result dark powder was treated with 4 M NH<sub>4</sub>HF<sub>2</sub> aqueous solution for 48 h to remove silica framework. Lastly, the dark sample was collected by centrifugation, washed with ultrapure water and ethanol several times and dried under vacuum for 4 h at 60 °C. The required mesoporous graphitic carbon nitride samples were labeled as MCN for convenience.

#### *1.3.2 Synthesis of MCN@NiCo<sub>2</sub>O<sub>4</sub> composites*

The NiCo<sub>2</sub>O<sub>4</sub>@MCN nanocomposites were synthesized via a hydrothermal method. Initially, the as-prepared MCN (100 mg) was dispersed into 40 mL deionized water under sonication. Afterwards, 1 mmol Ni(NO<sub>3</sub>)<sub>2</sub>·6H<sub>2</sub>O, 2 mmol Co(NO<sub>3</sub>)<sub>2</sub>·6H<sub>2</sub>O, 5 mmol urea and 4 mL PDDA were further added. After strongly stirring for 1 h, the above solution was transferred into Teflon-lined stainless steel autoclave and heated to 120 °C for 12 h. Then, the precipitates were collected through centrifugation, washed thoroughly with deionized water and ethanol several times, and dried at 80 °C overnight. Finally, the as-grown precursors were annealing at 350 °C for 2 h with a temperature ramp rate of 1 °C·min<sup>-1</sup>. By changing added amount of NiCo<sub>2</sub>O<sub>4</sub> (0.5 mmol, 1 mmol and 2 mmol), MCN@NiCo<sub>2</sub>O<sub>4</sub> composites with different ratios were prepared. And the composites were recorded as MCN@NiCo<sub>2</sub>O<sub>4</sub>-0.5, MCN@NiCo<sub>2</sub>O<sub>4</sub>-1 and MCN@NiCo<sub>2</sub>O<sub>4</sub>-2 in following experiment, respectively.

For comparison, the pure NiCo<sub>2</sub>O<sub>4</sub> was synthesized by the procedure similar to the above method without adding MCN.

### *1.3.3 Preparation of MCN@NiCo<sub>2</sub>O<sub>4</sub> coated fiber*

Stainless steel wires with a diameter of 0.1 mm were employed as support for preparation MCN@NiCo<sub>2</sub>O<sub>4</sub> coated fiber. All stainless steel wires have pre-treated by an immersion into a nitric acid: hydrochloric acid mixture solution (1:3, v/v) for 5 min to ensure an enough porosity on the wire surface. After cleaning, the treated stainless steel wires were immersed into sol-SiO<sub>2</sub> for 1 min, and then MCN@NiCo<sub>2</sub>O<sub>4</sub> powder was stuck to stainless steel wires, dried and repeated 10 times. Finally, the MCN@NiCo<sub>2</sub>O<sub>4</sub> coated fiber was heated in an vacuum oven at 80 °C for 12 h. Prior to use, all the fibers were assembled into a 5 μL microsyringe to make up a SPME device and exposed at 290 °C 1 h in GC injector port for activation to avoid any contamination.

### *1.4 Sample preparation*

The blood samples were extracted from a volunteer by venipuncture in sterilized vacutainer blood tubes. Human blood serum was obtained by whole blood sample

centrifugation at 6000 rpm for 10 min and stored at -20 °C prior to use.

### *1.5 HS-SPME procedures*

Herein, headspace-SPME (HS-SPME) was selected to decrease the damage of fiber coating and eliminate the interferences from complex matrices. For HS-SPME mode, 1.0 mL of human serum sample diluted with ultrapure water to 10.0 mL was placed into 20 mL glass vial and immediately sealed with PTFE-coated septum. A thermostatic water bath was chosen to control the extraction temperature, a Teflon-coated stir bar with magnetic stirring was used to agitate the solution and a certain quantity of NaCl was to give salting out effect. During the extraction, the fiber was carefully introduced directly into the headspace above the solution for a certain time. After extraction, the fiber was immediately inserted into GC injector port for thermal desorption and the fiber was conditioned at 290 °C for another 15 min before next extraction.

### *1.6 Determination of enrichment factors*

The adsorption affinity between the MCN@NiCo<sub>2</sub>O<sub>4</sub> fiber coating and the tested analytes were investigated in terms of the enrichment factor (EF), which was defined as the ratio of the analyte concentration after extraction and the original concentration. The following equation was used to calculate the EF parameter:

$$EF=C_f/C_s$$

Where  $C_f$  is the concentration of analyte after extraction and  $C_s$  is the concentration of analyte originally existed in the sample solution. The direct injection of 1  $\mu$ L of standard solution from 0.5-500  $\mu$ g·mL<sup>-1</sup> of analytes was performed to obtain the chromatographic peak areas.

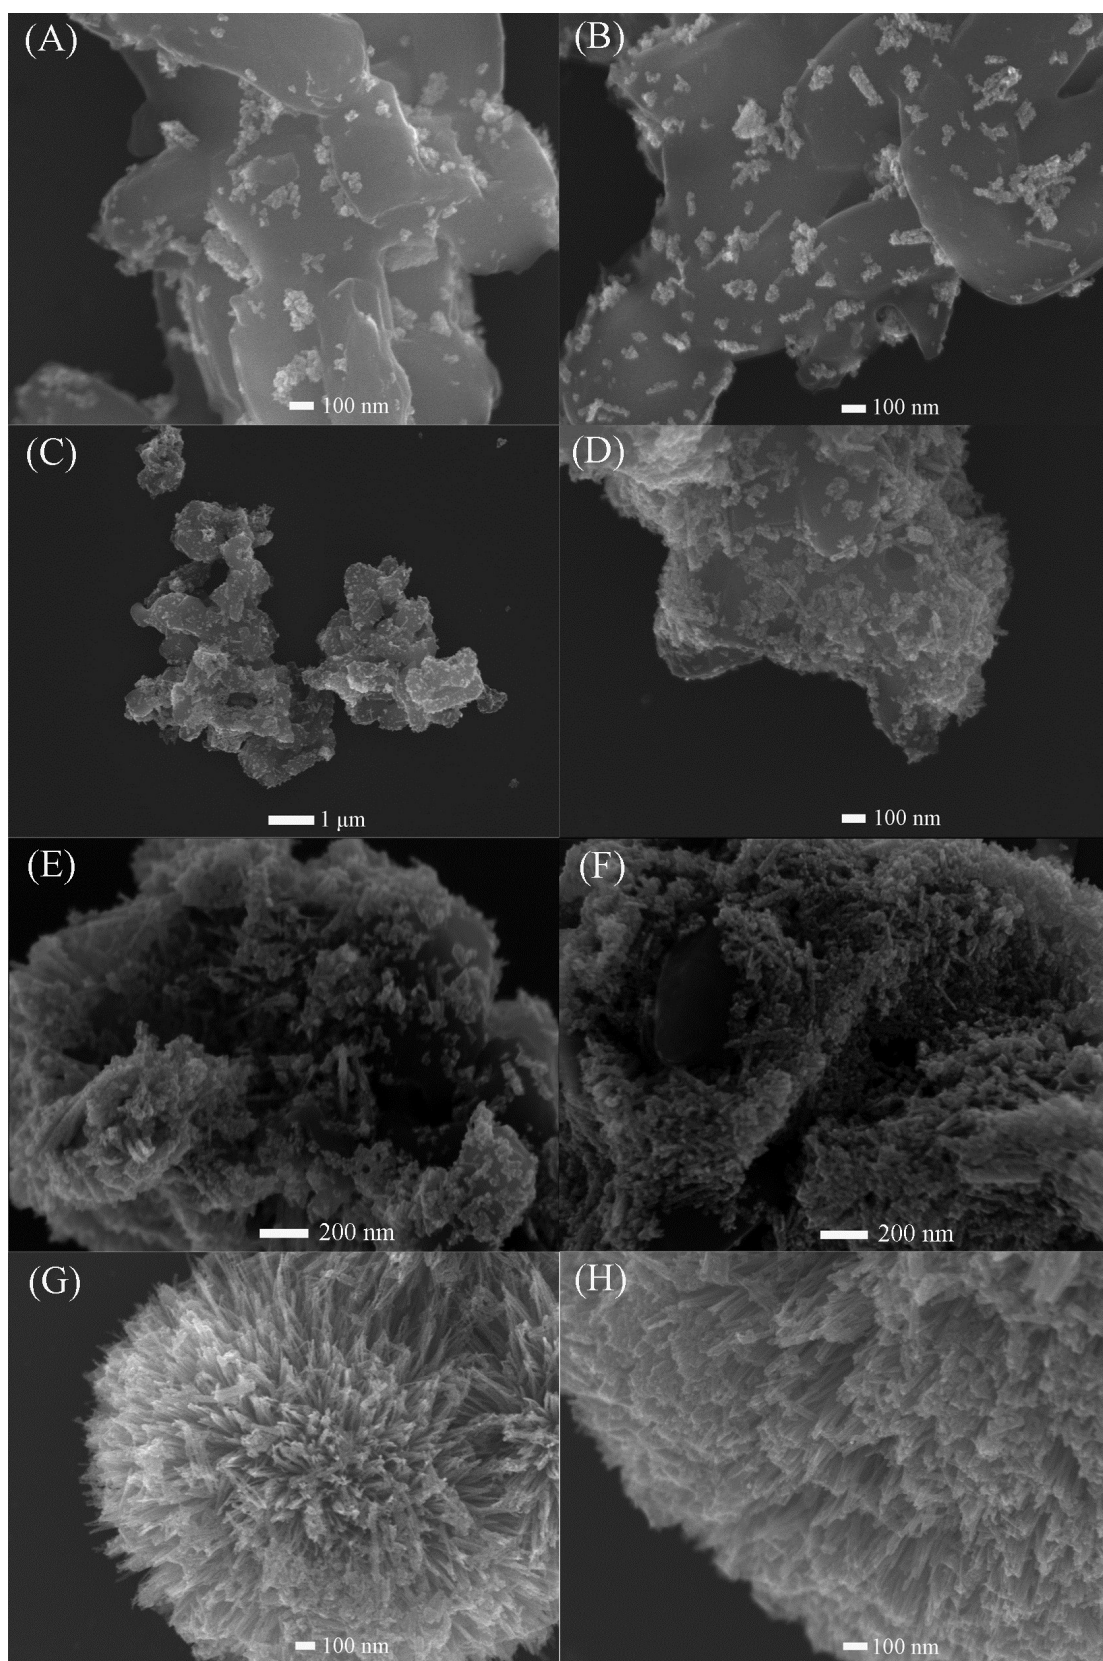

**Fig. S1** SEM images of the MCN@NiCo<sub>2</sub>O<sub>4-0.5</sub> (A, B), MCN@NiCo<sub>2</sub>O<sub>4-1</sub> (C, D), MCN@NiCo<sub>2</sub>O<sub>4-2</sub> (E, F) and pure NiCo<sub>2</sub>O<sub>4</sub> (G, H).

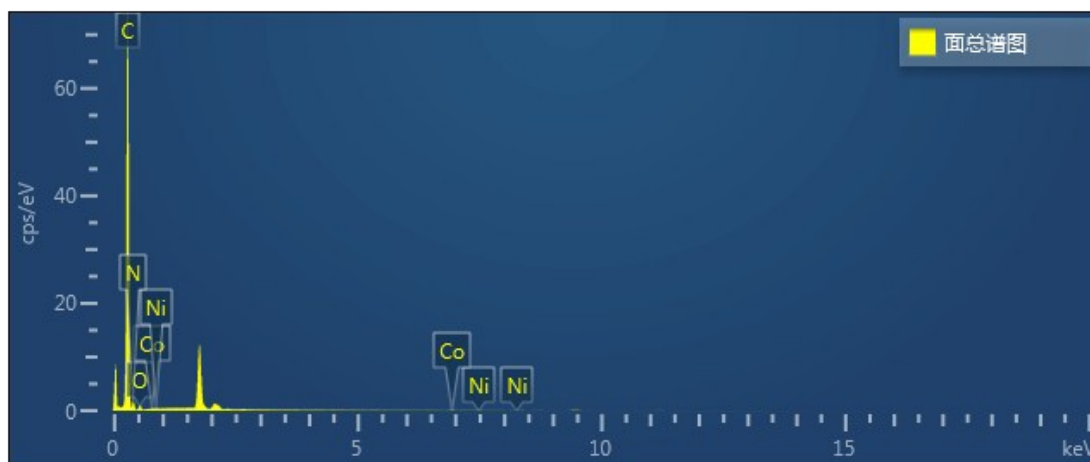

**Fig. S2** The element type analysis of MCN@NiCo<sub>2</sub>O<sub>4</sub> on energy dispersive spectrometer (EDS)

**Table S1** The content analysis of MCN@NiCo<sub>2</sub>O<sub>4</sub> on energy dispersive spectrometer (EDS)

| element | weight percent(%) | atomic percent(%) |
|---------|-------------------|-------------------|
| C       | 39.89             | 58.55             |
| O       | 24.02             | 26.47             |
| Co      | 21.02             | 6.29              |
| Ni      | 10.72             | 3.22              |
| N       | 4.35              | 5.47              |

## **2 Optimization of HS-SPME procedures**

### *2.2.1 Extraction temperature*

As one of the significant parameters effects on the headspace extraction efficiency, the extraction temperature was investigated from 30 to 80 °C. As shown in Fig. S3A, the peak areas of all analytes increased rapidly from 30 to 60 °C and then reached the maximum plateau. Generally, increasing the extraction temperature can improve the diffusion of analytes from bulk water phase to headspace and accordingly facilitate the coating adsorption. Nevertheless, most surface adsorption process is an exothermic process, excessive high temperature may decrease the extraction efficiency. Therefore, the extraction temperature of 60 °C was chosen for the following experiments.

### *2.2.2 Extraction time*

SPME is an equilibrium-based extraction procedure, and sufficient time is need to transfer of analytes from sample solution to the MCN@NiCo<sub>2</sub>O<sub>4</sub> coated fiber. In this experiments, the effect of extraction time was investigated from 10 to 60 min. The results shown in Fig. S3B presented that the peak areas of all analytes continue to increase until reached equilibrium at 30 min and then slightly decreased. Considering both sides of getting maximum extraction efficiency and saving time, 30 min was selected as the most suitable extraction time.

### *2.2.3. Desorption temperature*

Desorption temperature is another key parameter that effect on the extraction efficiency for SPME. As we know, increasing the desorption temperature can completely release analytes from the fiber coating to provide a satisfactory sensitivity while inevitably shorten lifetime of the fiber. Therefore, the desorption temperature was systematically investigated in the range of 240 to 300 °C (Fig. S3C). It is obviously observed that the response signal of the PCB-14, PCB-12, PHE, ANT and PYR showed an upward trend from 240 to 290 °C. When the desorption temperature



higher than 290 °C, the response signals of the NAP, ANE, PCB-3 and FLU have slightly decrease. Consequently, the desorption temperature was set at 290 °C.

#### *2.2.4. Desorption time*

The desorption time is another important desorption conditions. A suitable desorption time can not only insure the analytes fully released from the fiber but also avoid the crossover contamination in following experiments. Otherwise, the long-term desorption in GC injector port may cause the fiber to be broken due to the incessant high temperature. Therefore, the desorption time was investigated from 0.5-3.0 min while the desorption temperature was set as 290 °C. Result shown in Fig. S3D revealed that the desorption efficiency was enhanced with increasing the desorption time from 0.5 to 2.5 min and subsequent kept almost constant. Hence, 2.5 min was sufficient for the analytes to desorb from the MCN@NiCo<sub>2</sub>O<sub>4</sub> coated fiber at 290 °C.

#### *2.2.5. Agitation speed*

The agitation speed is another factor influencing the diffusion of analytes into the headspace which was also studied in this experiment. In general, effective agitation can increase transfer of analytes from sample solution to the headspace and shorten the equilibrium time. However, an excessive stirring speed may reduce the extraction efficiency due to the formation of bubbles inside the solution and the volatile analytes assumed around the bottle cap. The agitation speed was investigated from 0 to 1200 rpm in Fig. S3E, the peak areas of the analytes increased slightly as increasing the agitation speed from 0 to 1000 rpm and up to the maximum at 1000 rpm. As a consequence, the optimal agitation speed was considered to be 1000 rpm.

#### *2.2.6 Salt concentration*

The addition of salt can increase the ionic strength of solution, and cause salting-out effect so that affect the headspace extraction efficiency. The extent of this influences depended on both sides of chemical structure and salt concentration. Therefore, NaCl was selected to adjust ionic strength and different concentration from 0 to 30% (w/v) was evaluated in this study. As seen from Fig. S3F, the peak areas of

six PAHs increased slightly with adding NaCl. However, the extraction efficiency of the three PCBs increased with increasing NaCl concentration from 0% to 10% (w/v) and then appear decrease or rise-fall tendency with the further increasing NaCl concentration from 10% to 30% (w/v). This phenomenon can be explained by two processes that occurred simultaneously in the extraction process. On the one hand, from the thermodynamic point of view, the addition of NaCl salt due to the salting-out effect, which reduced the solubility of the target PCBs in the aqueous phase and promote the diffusion of analytes to the fiber coating so that leading to an increase in the amount of analytes extracted by MCN@NiCo<sub>2</sub>O<sub>4</sub> coated fiber. On the other hand, from a kinetic point of view, addition of NaCl salt can enhance the viscosity and density of the aqueous phase which is unfavorable for the extraction efficiency.<sup>2</sup> Thus, NaCl concentration of 10% (w/v) in the sample solution was employed for further investigation.

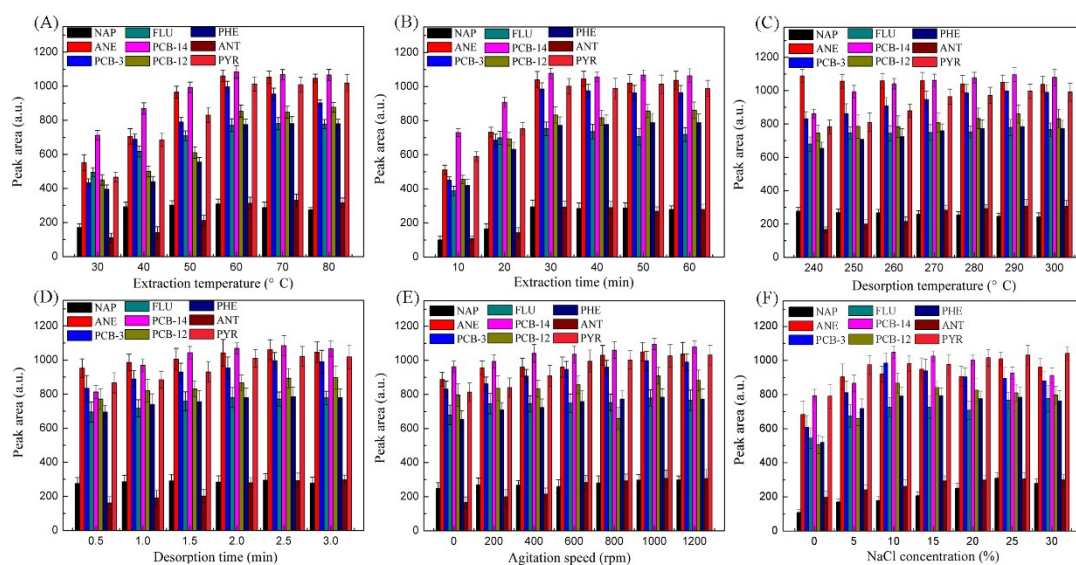

**Fig. S3** Effect of the experimental conditions on extraction efficiency of MCN@NiCo<sub>2</sub>O<sub>4</sub> coated fiber for 100 ng·mL<sup>-1</sup> PCBs and PAHs. (A) Extraction temperature; (B) Extraction time; (C) Desorption temperature; (D) Desorption time; (E) Agitation speed; (F) NaCl concentration. Error bar shows the standard deviation for triplicate determinations (n=3).

### 3. Analytical performance of the MCN@NiCo<sub>2</sub>O<sub>4</sub> coated fiber

#### 3.1 Comparison of the different ratios MCN@NiCo<sub>2</sub>O<sub>4</sub> coated fibers with pure NiCo<sub>2</sub>O<sub>4</sub> and MCN coated fiber

The extraction performance of different ratios MCN@NiCo<sub>2</sub>O<sub>4</sub> coated fibers

were compared with the pure NiCo<sub>2</sub>O<sub>4</sub> and MCN coated fiber, respectively. As the results shown in Fig. S4, the MCN@NiCo<sub>2</sub>O<sub>4</sub> coated fiber provided the higher peak areas for the target analytes than the pure NiCo<sub>2</sub>O<sub>4</sub> and MCN coated fiber at the same conditions, demonstrated that the prepared MCN@NiCo<sub>2</sub>O<sub>4</sub> nanocomposite was a favorable coating for extraction PCBs and PAHs. Compared the three different ratios MCN@NiCo<sub>2</sub>O<sub>4</sub> coated fibers, it is obviously observed that the extraction efficiency increased as the ratio of MCN increasing. The superior extraction performance of MCN@NiCo<sub>2</sub>O<sub>4</sub> coating can be attributed to its advantageous porosity, meanwhile, the synergistic effects including  $\pi$ - $\pi$  interaction hydrophobic interaction and hydrogen bonding interaction between the coating and target analytes.

Lifetime is another key factor to evaluate the performance of the fiber coating. The lifetimes of the fibers were investigated by subjecting a standard solution of target analytes at 100 ng·mL<sup>-1</sup> to several adsorption/desorption cycles. From Fig. S3, it can be seen that the extraction performance of MCN had an obvious decline after being extracted 5 times. When a handful of NiCo<sub>2</sub>O<sub>4</sub> incorporated with MCN, the extraction performance has been greatly improved while the life time of the MCN@NiCo<sub>2</sub>O<sub>4</sub>-0.5 coated fiber was too short (remarkable decreased after 2 extraction cycles). While the MCN@NiCo<sub>2</sub>O<sub>4</sub>-1 coated fiber was still acceptable after 150 times extraction after moderate incorporation of NiCo<sub>2</sub>O<sub>4</sub>, indicating an excellent durability of MCN@NiCo<sub>2</sub>O<sub>4</sub>-1 coated fiber. When there are relatively large numbers of NiCo<sub>2</sub>O<sub>4</sub> incorporation, the MCN@NiCo<sub>2</sub>O<sub>4</sub>-2 coated fiber showed a long life time just like pure NiCo<sub>2</sub>O<sub>4</sub>, but the extraction performance was not well. It can be attributed to that a large number of NiCo<sub>2</sub>O<sub>4</sub> grew on the outside of MCN and occupied a certain adsorption sites.

Therefore, considering both extraction efficiency and life time of the fiber, MCN@NiCo<sub>2</sub>O<sub>4</sub>-1 has been selected in this study.

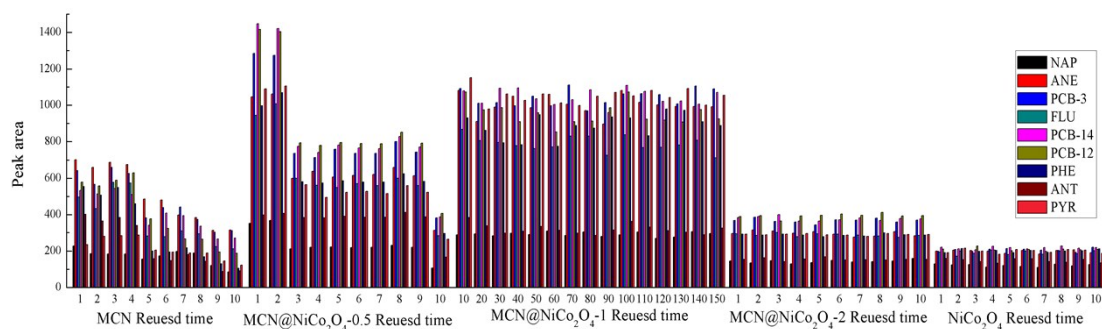

**Fig. S4** Comparison the extraction performance and lifetime of the different ratios MCN@NiCo<sub>2</sub>O<sub>4</sub> coated fibers with pure NiCo<sub>2</sub>O<sub>4</sub> and MCN coated fiber.

### 3.2 The features and further applications

MCN which has the larger surface area, special porosity, in-built N-rich functional groups and electronic delocalization properties endow the MCN with complex extraction mechanism, involving  $\pi$ - $\pi$  conjugation, hydrogen bond interaction, electrostatic interaction and hydrophobic effect<sup>3,4</sup>. The NiCo<sub>2</sub>O<sub>4</sub> metal oxides whose structure Ni occupies the octahedral sites and Co is fixed in the octahedral and tetrahedral sites have a large nature abundance ability. NiCo<sub>2</sub>O<sub>4</sub> is also a promising transition metal oxides for pseudocapacitors owing to its intriguing electronic conductivity, low diffusion resistance to protons/cations, and easy electrolyte penetration<sup>5-8</sup>. The MCN@NiCo<sub>2</sub>O<sub>4</sub> composite remain both advantages of MCN and NiCo<sub>2</sub>O<sub>4</sub>, is looking forward to further exploit for other applications in photocatalysis, supercapacitors, fuel cells, gas storage, electrogenerated chemiluminescence, sensing and bioimaging.

Table S2 Physical-chemical properties of different analytes and the enrichment factors (EFs) for the analytes on the MCN@NiCo<sub>2</sub>O<sub>4</sub> coated fiber (n=3)

| Analyte       | Structure                                                                           | Molecular weight | $\log K_{ow}^a$ | EFs  |
|---------------|-------------------------------------------------------------------------------------|------------------|-----------------|------|
| NAP           | 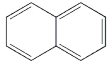   | 128.171          | 3.30            | 1235 |
| ANE           |    | 154.208          | 3.92            | 2187 |
| FLU           |    | 166.219          | 4.18            | 1722 |
| PHE           |    | 178.229          | 4.46            | 2420 |
| ANT           |    | 178.229          | 4.45            | 1590 |
| PYR           |   | 202.251          | 4.88            | 2674 |
| PCB-3         |  | 188.653          | 4.61            | 3765 |
| PCB-14        |  | 223.098          | 5.41            | 4094 |
| PCB-12        |  | 223.098          | 5.29            | 3924 |
| Undecane      |  | 156.308          | 5.74            | 93   |
| Dodecane      |  | 170.335          | 6.10            | 128  |
| Tetradecane   |  | 198.388          | 7.20            | 136  |
| Octadecane    |  | 254.494          | 9.18            | 171  |
| Undecanol     |  | 172.308          | 4.28            | 367  |
| Dodecanol     |  | 186.334          | 5.13            | 424  |
| Tetradecaneol |  | 214.387          | 6.03            | 472  |
| Octadecanol   |  | 270.494          | 7.72            | 529  |

<sup>a</sup> $\log K_{ow}$ : n-octanol/water partition coefficients, indicator for hydrophobicity. Data taken from RSC publishing Home: <http://www.chemspider.com/>

**Table S3** The Linearity, LOQs, LODs and precision parameters of the method 3.30 for the analysis of PCBs and PAHs.

| Analytes | Linearity                    |                        |        | LOQs (pg·mL <sup>-1</sup> ) | LODs (pg·mL <sup>-1</sup> ) | Precision (RSDs,%) |                |                      |
|----------|------------------------------|------------------------|--------|-----------------------------|-----------------------------|--------------------|----------------|----------------------|
|          | Range (ng·mL <sup>-1</sup> ) | Linear equation        | r      |                             |                             | Intraday (n=5)     | Interday (n=5) | Fiber to fiber (n=3) |
| NAP      | 0.010-0.50                   | $y = 33.921x + 0.2744$ | 0.9952 | 10.0                        | 3.1                         | 2.83               | 5.26           | 7.10                 |
|          | 0.50-100.0                   | $y = 3.14x + 12.116$   | 0.9996 |                             |                             |                    |                |                      |
| ANE      | 0.005-0.50                   | $y = 36.069x + 0.7029$ | 0.9944 | 5.0                         | 2.7                         | 6.83               | 7.25           | 11.74                |
|          | 0.50-100.0                   | $y = 5.8599x + 6.2227$ | 0.9987 |                             |                             |                    |                |                      |
| PCB-3    | 0.002-0.50                   | $y = 36.069x + 0.7029$ | 0.9956 | 2.0                         | 0.9                         | 7.21               | 7.61           | 9.90                 |
|          | 0.50-100.0                   | $y = 9.9539x + 56.244$ | 0.9993 |                             |                             |                    |                |                      |
| FLU      | 0.010-0.50                   | $y = 9.1091x + 0.3701$ | 0.9956 | 10.0                        | 2.3                         | 6.80               | 8.42           | 6.28                 |
|          | 0.50-100.0                   | $y = 2.9832x + 5.4918$ | 0.9989 |                             |                             |                    |                |                      |
| PCB-14   | 0.002-0.50                   | $y = 83.584x + 1.3763$ | 0.9959 | 2.0                         | 1.2                         | 5.78               | 6.30           | 4.62                 |
|          | 0.50-100.0                   | $y = 9.8447x + 39.78$  | 0.9993 |                             |                             |                    |                |                      |
| PCB-12   | 0.002-0.50                   | $y = 86.972x + 0.6814$ | 0.9997 | 2.0                         | 1.2                         | 7.47               | 9.62           | 7.03                 |
|          | 0.50-100.0                   | $y = 7.9901x + 46.815$ | 0.9989 |                             |                             |                    |                |                      |
| PHE      | 0.005-0.50                   | $y = 71.901x + 1.1211$ | 0.9971 | 5.0                         | 1.6                         | 5.60               | 8.74           | 11.84                |
|          | 0.50-100.0                   | $y = 7.369x + 32.973$  | 0.9991 |                             |                             |                    |                |                      |
| ANT      | 0.010-00.50                  | $y = 31.793x + 0.1017$ | 0.9975 | 10.0                        | 3.3                         | 6.86               | 9.09           | 13.12                |
|          | 0.50-100.0                   | $y = 3.0364x + 25.184$ | 0.9984 |                             |                             |                    |                |                      |
| PYR      | 0.002-0.50                   | $y = 98.121x + 0.5771$ | 0.9998 | 2.0                         | 1.2                         | 5.29               | 9.02           | 8.78                 |
|          | 0.50-100.0                   | $y = 10.594x + 13.081$ | 0.9998 |                             |                             |                    |                |                      |

**Table S4** Comparison of the different fibers for the SPME of PCBs and PAHs.

| Analytes | Sorbents                                 | Sample                           | LODs<br>(pg·mL <sup>-1</sup> ) | Analytical method | Lifetime<br>(times) | Refs.     |
|----------|------------------------------------------|----------------------------------|--------------------------------|-------------------|---------------------|-----------|
| PAHs     | 3D-IL-Fe <sub>3</sub> O <sub>4</sub> -GO | Human blood                      | 20.0-50.0                      | PT-SPE-GC-FID     | -                   | 9         |
| PAHs     | Sol-gel CNF-PDMS                         | Water                            | 5.0-20.0                       | SPME-GC-FID       | ≥180                | 10        |
| PAHs     | AgNPs                                    | Water                            | 600-14000                      | SPME-GC-FID       | ≥150                | 11        |
| PAHs     | IL-hybridized sol-gel                    | Cigarette smoke<br>Cigarette ash | 15.0-30.0                      | SPME-GC-FID       | ≥120                | 12        |
| PAHs     | PEDOT@AuNPs                              | Water, soil                      | 2.5-25.0                       | SPME-GC-FID       | ≥160                | 1         |
| PAHs     | Graphene                                 | Water                            | 1.0-20.0                       | SPE-GC-FID        | - <sup>a</sup>      | 13        |
| PAHs     | MCN@NiCo <sub>2</sub> O <sub>4</sub>     | Human serum                      | 1.2-3.3                        | SPME-GC-FID       | ≥150                | This work |
| PCBs     | PDMS                                     | Human serum                      | 70.0-1790                      | SPME-GC/MS        | -                   | 14        |
| PCBs     | PDMS                                     | Human serum                      | 1.0-12.0                       | SPME-GC-ECD       | -                   | 15        |
| PCBs     | -                                        | Human serum                      | 3.0-47.0                       | SB-μ-SPE-GC/MS    | -                   | 16        |
| PCBs     | C18                                      | Human serum                      | 8.0-44.0                       | SPE-GC/HRMS       | -                   | 17        |
| PCBs     | Poly-IL                                  | Water                            | 0.9-5.8                        | SPME-GC-ECD       | ≥250                | 18        |
| PCBs     | MIL-53(Fe)                               | Soil                             | 50.0-90.0                      | SPME-GC-MS        | ≥50                 | 19        |
| PCBs     | MCN@NiCo <sub>2</sub> O <sub>4</sub>     | Human serum                      | 0.9-1.2                        | SPME-GC-FID       | ≥150                | This work |

<sup>a</sup> Not mentioned.

**Table S5** The recoveries of the developed method for analysis of target analytes in serum sample.

| Analytes | Add (ng·mL <sup>-1</sup> ) | Found (ng·mL <sup>-1</sup> ) | Recovery (%) | RSDs (n=3, %) |
|----------|----------------------------|------------------------------|--------------|---------------|
| NAP      | 0                          | N.D. <sup>a</sup>            | -            | -             |
|          | 0.1                        | 0.11                         | 98.3-119.0   | 10.1          |
|          | 5.0                        | 4.38                         | 82.7-93.5    | 6.3           |
|          | 10.0                       | 11.09                        | 104.1-115.6  | 5.4           |
| ANE      | 0                          | 0.66                         | -            | -             |
|          | 0.1                        | 0.09                         | 80.0-96.6    | 9.4           |
|          | 5.0                        | 5.24                         | 99.9-110.5   | 5.1           |
|          | 10.0                       | 9.79                         | 93.0-106.4   | 7.6           |
| PCB-3    | 0                          | 0.70                         | -            | -             |
|          | 0.1                        | 0.11                         | 104.5-118.0  | 6.1           |
|          | 5.0                        | 4.22                         | 75.1-90.9    | 9.8           |
|          | 10.0                       | 10.43                        | 95.8-111.5   | 7.6           |
| FLU      | 0                          | N.D. <sup>a</sup>            | -            | -             |
|          | 0.1                        | 0.11                         | 105.8-119.8  | 6.3           |
|          | 5.0                        | 4.70                         | 86.5-99.3    | 7.0           |
|          | 10.0                       | 8.05                         | 76.8-83.2    | 4.1           |
| PCB-14   | 0                          | 0.78                         | -            | -             |
|          | 0.1                        | 0.12                         | 110.0-121.2  | 4.8           |
|          | 5.0                        | 5.35                         | 93.7-115.4   | 10.9          |
|          | 10.0                       | 7.96                         | 76.2-85.1    | 6.1           |
| PCB-12   | 0                          | 0.45                         | -            | -             |
|          | 0.1                        | 0.10                         | 95.6-109.4   | 6.8           |
|          | 5.0                        | 4.05                         | 74.8-91.1    | 10.8          |
|          | 10.0                       | 7.77                         | 72.4-85.1    | 7.8           |
| PHE      | 0                          | N.D. <sup>a</sup>            | -            | -             |
|          | 0.1                        | 0.12                         | 110.2-119.5  | 4.1           |
|          | 5.0                        | 4.47                         | 79.6-95.3    | 9.6           |
|          | 10.0                       | 7.87                         | 73.7-87.4    | 9.7           |
| ANT      | 0                          | N.D. <sup>a</sup>            | -            | -             |
|          | 0.1                        | 0.10                         | 88.0-110.0   | 11.1          |
|          | 5.0                        | 4.46                         | 79.8-98.2    | 10.3          |
|          | 10.0                       | 10.39                        | 97.5-111.7   | 6.9           |
| PYR      | 0                          | 0.09                         | -            | -             |
|          | 0.1                        | 0.11                         | 100.1-113.4  | 6.2           |
|          | 5.0                        | 5.00                         | 90.7-107.3   | 8.5           |
|          | 10.0                       | 7.52                         | 72.5-79.3    | 4.8           |

<sup>a</sup>Not

detected.



## Reference

1. L. Yang, J. Zhang, F. Zhao and B. Zeng, *J. Chromatogr. A*, 2016, **1471**, 80.
2. F. Lv, N. Gan, Y. Cao, Y. Zhou, R. Zuo and Y. Dong, *J. Chromatogr. A*, 2017, **1525**, 42.
3. J. Zhang, W. Li, W. Zhu, Y. Yang, P. Qin, Q. Zhou and M. Lu, *Microchim. Acta*, 2019, **2**, 1–9.
4. M. Ghaemmaghami, Y. Yamini, H. Amanzadeh and B. H. Monjezi, *Chem. Commun.*, 2018, **54**, 507–510.
5. Y. Wei, S. Chen, D. Su and B. Sun, *J. Mater. Chem. A*, 2014, **2**, 8103–8109.
6. G. Zhang, X. Wen and D. Lou, *Adv. Mater.*, 2013, **25**, 976–979.
7. D. U. Lee, B. J. Kim and Z. Chen, *J. Mater. Chem. A*, 2013, **1**, 4754–4762.
8. N. Iqbal, X. Wang, A. Ahmed, J. Yu and B. Ding, *J. Colloid. Interface. Sci.*, 2016, **476**, 87–93.
9. Y. Zhang, Y. Zhao, W. Chen, H. Cheng, X. Zeng and Y. Zhu, *J. Chromatogr. A*, 2018, **1552**, 1.
10. Amiri and F. Ghaemi, *Microchim. Acta*, 2016, **183**, 1917.
11. A. Gutiérrez-serpa, P. I. Napolitano-tabares, V. Pino and F. Jiménez-moreno, *Microchim. Acta*, 2018, **185**, 341.
12. Y. Tian, J. Feng, X. Wang, C. Luo and M. Sun, *J. Chromatogr. A*, 2019, **1583**, 48.
13. A. Amiri and F. Ghaemi, *Anal. Chim. Acta*, 2017, **994**, 29.
14. R. Flores-ramírez, M. D. Ortiz-pérez, L. Batres-esquivel and C. G. Castillo, *Talanta*, 2014, **123**, 169.
15. A. Etxandia, E. Mill, L. Raul and F. Go, *J. Chromatogr. B*, 2007, **846**, 298.
16. M. Sajid and C. Basheer, *J. Chromatogr. A*, 2016, **1455**, 37.
17. J. Wittsiepe, M. Nestola, M. Kohne, P. Zinn and M. Wilhelm, *J. Chromatogr. B*, 2014, **945–946**, 217.
18. J. Li, F. Wang, J. Wu and G. Zhao, *Microchim. Acta*, 2017, **184**, 2621.
19. F. Lv, N. Gan, J. Huang, F. Hu, Y. Cao and Y. Zhou, *Microchim. Acta*, 2017, **184**, 2561.
